# Supplementary material
Source: publisher site journal article supplement (https://www.dovepress.com/article/392599)
Supplement: Supplementary file 1 [file get_supplementary_file.php]

## Supplemental tables

**Table S1** Primer sequences used in real-time quantitative PCR assay.

| Gene           | Forward primer (5'-3') | Reverse primer (5'-3') |
|----------------|------------------------|------------------------|
| Mas1           | CATCTAGGACTGGGCAGAGC   | AGTCAGGAGGTGGAGAGCAA   |
| TNF- $\alpha$  | GTCTACTGAACTTCGGGGTGAT | ATGATCTGAGTGTGAGGGTCTG |
| IL-6           | ACAAAGCCAGAGTCCTTCAGAG | CATTGGAAATTGGGGTAGGA   |
| IL-1 $\beta$   | CTTCAGGCAGGCAGTATC     | CCAGCAGGTTATCATCATCA   |
| $\beta$ -actin | ACCACACCTTCTACAATGAG   | ACGACCAGAGGCATACAG     |

## Supplemental figures

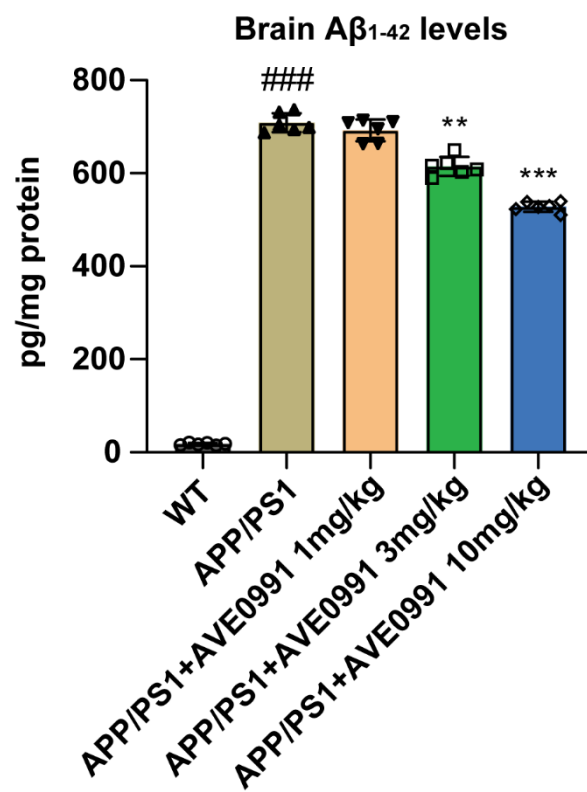

**Supplementary Figure 1** AVE 0991 reduces soluble A $\beta$ <sub>1-42</sub> concentrations in the brain cortex of APP/PS1 mice. The levels of soluble A $\beta$ <sub>1-42</sub> in the brain cortex of mice injected with AVE 0991 was measured by ELISA assay (n = 6). All data are presented as mean  $\pm$  SEM. ### $P$  <

0.001 vs. the WT group; \*\* $P < 0.01$  and \*\*\* $P < 0.001$  vs. the APP/PS1 group.

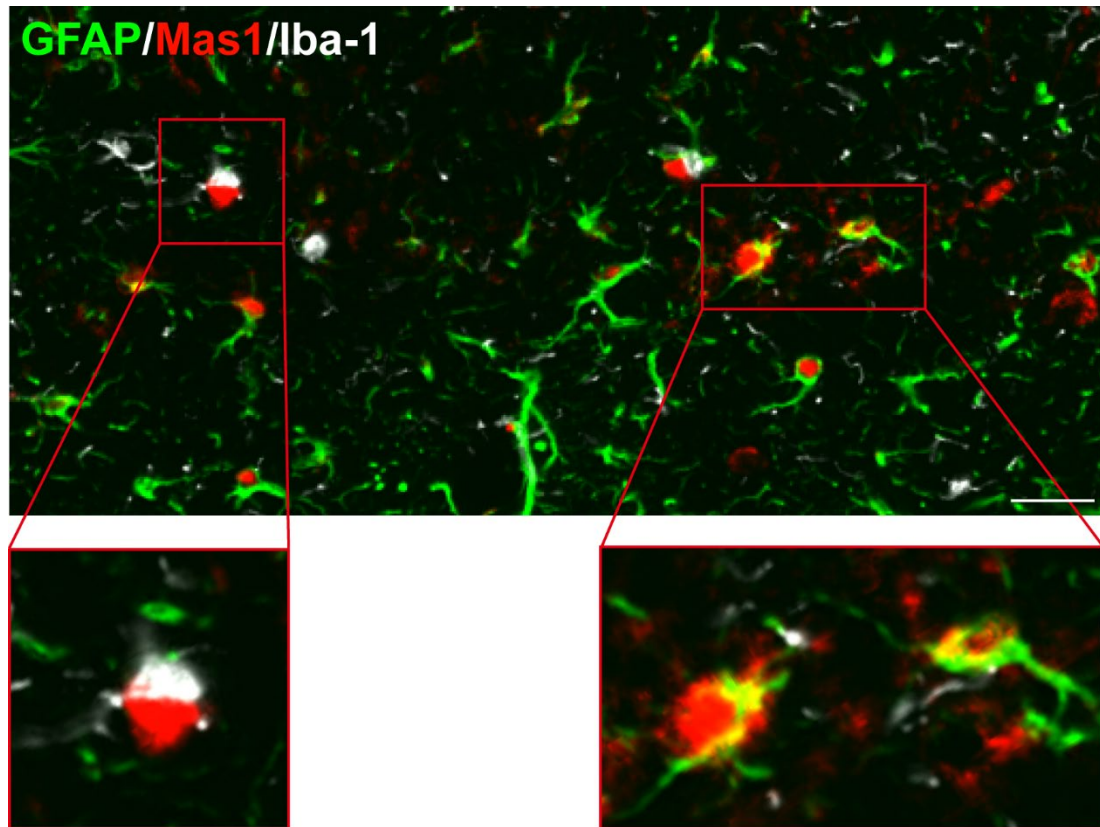

**Supplementary Figure 2** The distribution of Mas1 (red) in astrocytes (GFAP/green) and microglia (Iba-1/white) in the brain cortex of APP/PS1 mice were detected via Immunofluorescence staining. Nuclei subjected to DAPI-staining. Scale bar, 20  $\mu\text{m}$ .

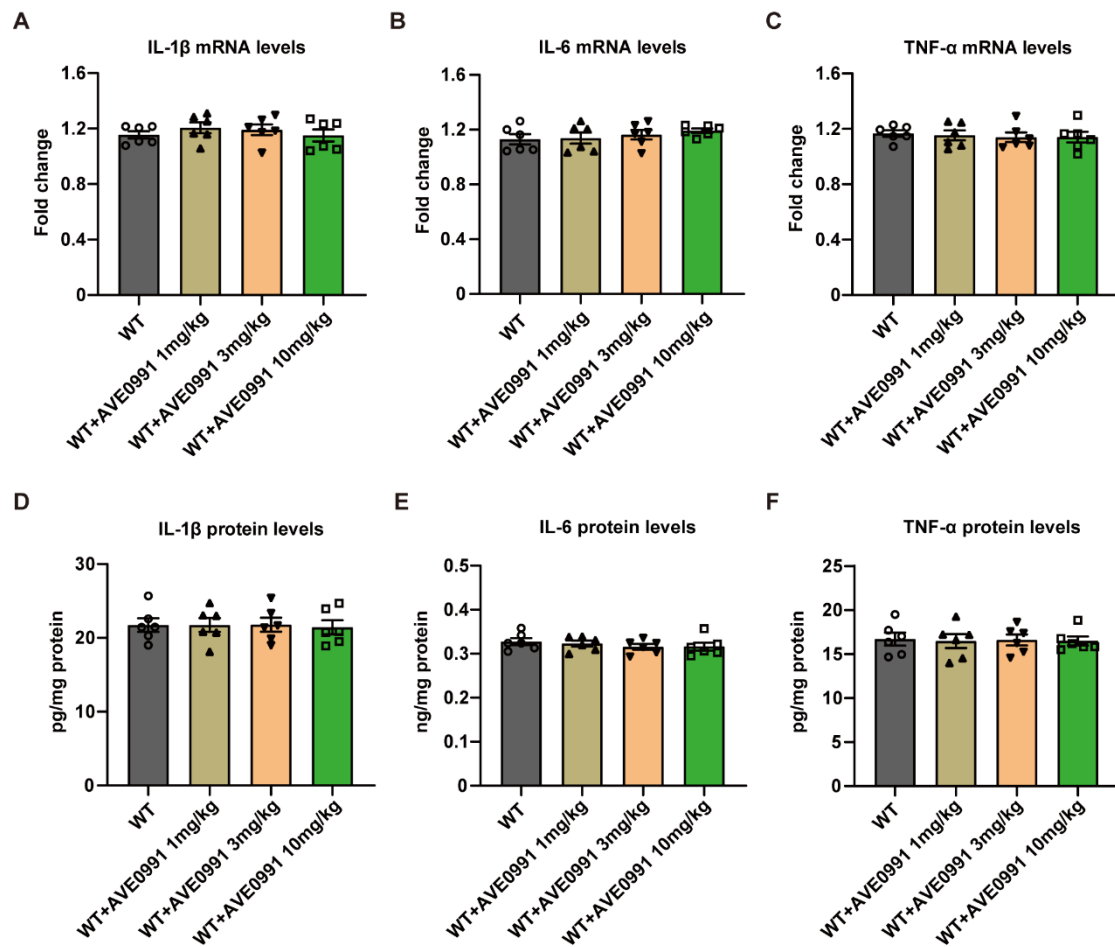

**Supplementary Figure 3** AVE 0991 had no influence on inflammatory cytokine levels in WT mice. The mRNA expressions of IL-1 $\beta$  (**A**), IL-6 (**B**) and TNF- $\alpha$  (**C**) in the brain cortex of WT mice injected with AVE 0991 were detected by qRT-PCR (n = 6). The protein expressions of IL-1 $\beta$  (**D**), IL-6 (**E**) and TNF- $\alpha$  (**F**) in the brain cortex of WT mice injected with AVE 0991 were measured by ELISA assay (n = 6). All data are presented as mean  $\pm$  SEM.

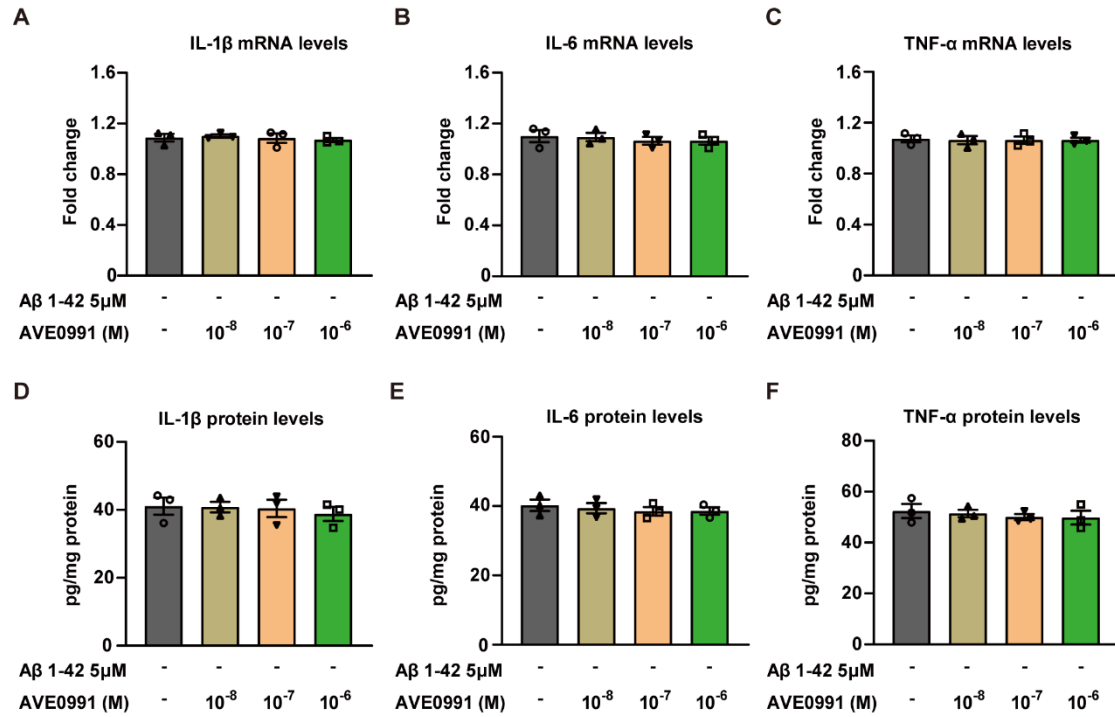

**Supplementary Figure 4** AVE 0991 had no influence on inflammatory cytokine levels in normal astrocytes. The mRNA expressions of IL-1 $\beta$  (A), IL-6 (B) and TNF- $\alpha$  (C) in normal astrocytes treated with AVE 0991 were detected by qRT-PCR (n = 3). The protein expressions of IL-1 $\beta$  (D), IL-6 (E) and TNF- $\alpha$  (F) in normal astrocytes treated with AVE 0991 were measured by ELISA assay (n = 3). All data are presented as mean  $\pm$  SEM.

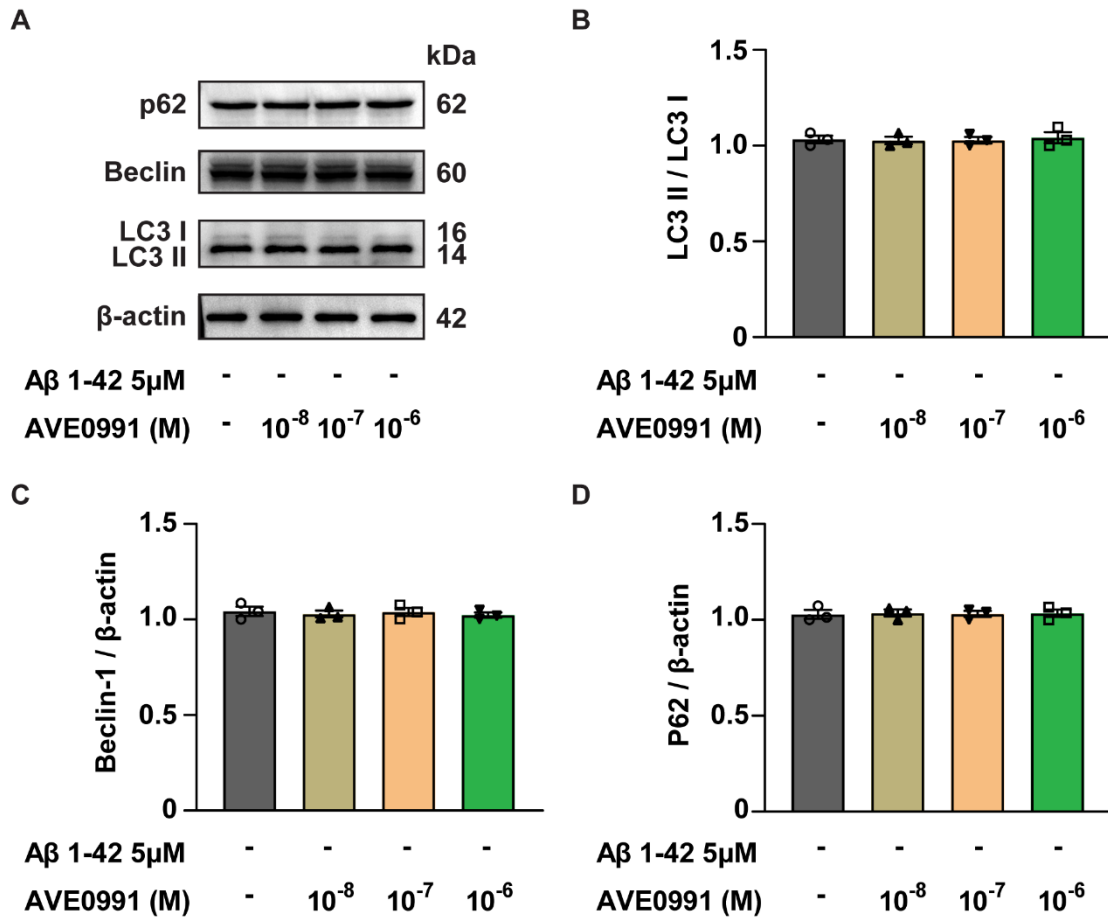

**Supplementary Figure 5** AVE 0991 had no influence on autophagy-related proteins in normal astrocytes. (A) The protein expressions of LC3, Beclin-1 and P62 in normal astrocytes treated with AVE 0991 were evaluated by Western blot analysis. β-actin was used as the loading control (n = 3). Quantitative analysis of LC3 (B), Beclin-1 (C) and P62 (D) protein levels was shown as bar chart (n = 3). All data are presented as mean ± SEM.
